# Supplementary material for: Diazotrophs and N2-Fixation Associated With Particles in Coastal Estuarine Waters
Source: PubMed Central journal article supplement (PMC6250843; doi:10.3389/fmicb.2018.02759), 2018-11-16
Supplement: Table_1.pdf [file Table_1.pdf]

*Supplementary Material*

**Diazotrophs and N<sub>2</sub>-fixation associated with particles in coastal estuarine waters**

**Jeppe N. Pedersen, Deniz Bombar<sup>\*</sup>, Ryan W. Paerl<sup>1</sup> and Lasse Riemann<sup>\*</sup>**

Marine Biological Section, Department of Biology, University of Copenhagen,

Helsingør, Denmark

**\* Correspondence:**

Deniz Bombar, Lasse Riemann

Email: [dbombar@sund.ku.dk](mailto:dbombar@sund.ku.dk); [lriemann@bio.ku.dk](mailto:lriemann@bio.ku.dk)

Supplementary Figures

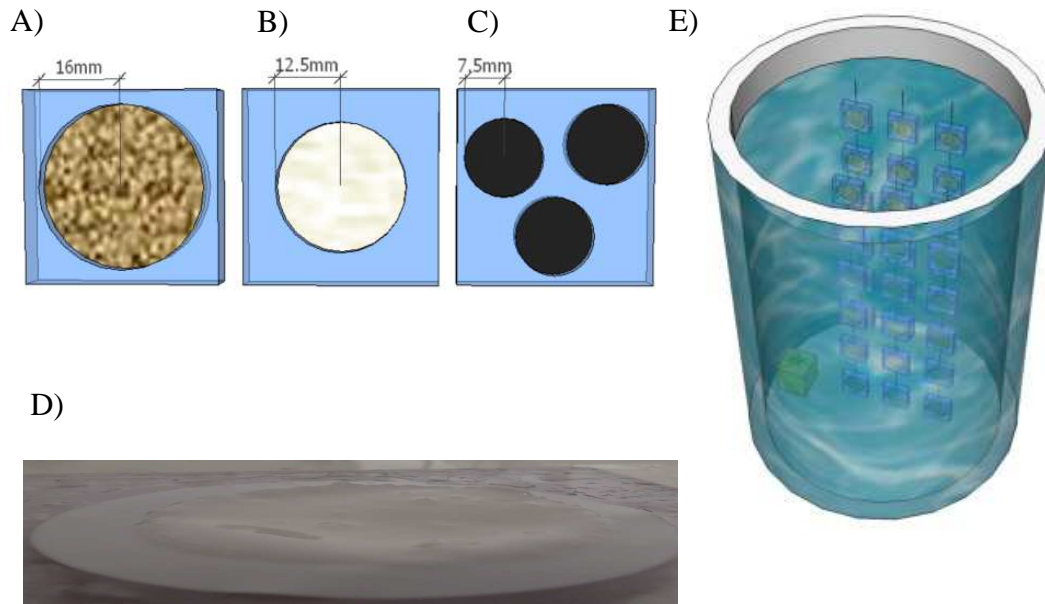

Fig. S1: Colonization experimental setup: A) filter for DNA (0.22  $\mu\text{m}$  membrane Supor), B) filter for nutrient composition GF/F pre-combusted (500  $^{\circ}\text{C}$ , 12 h) filters, C) filters for microscopy (0.22  $\mu\text{m}$  black polycarbonate, Whatman, GE Healthcare, Little Chalfont). D) Layer of nutrient added agar coating all filters. E) Schematic figure showing the colonization tank 120 L, with hanging agar covered filters and pump for water circulation (yellow).

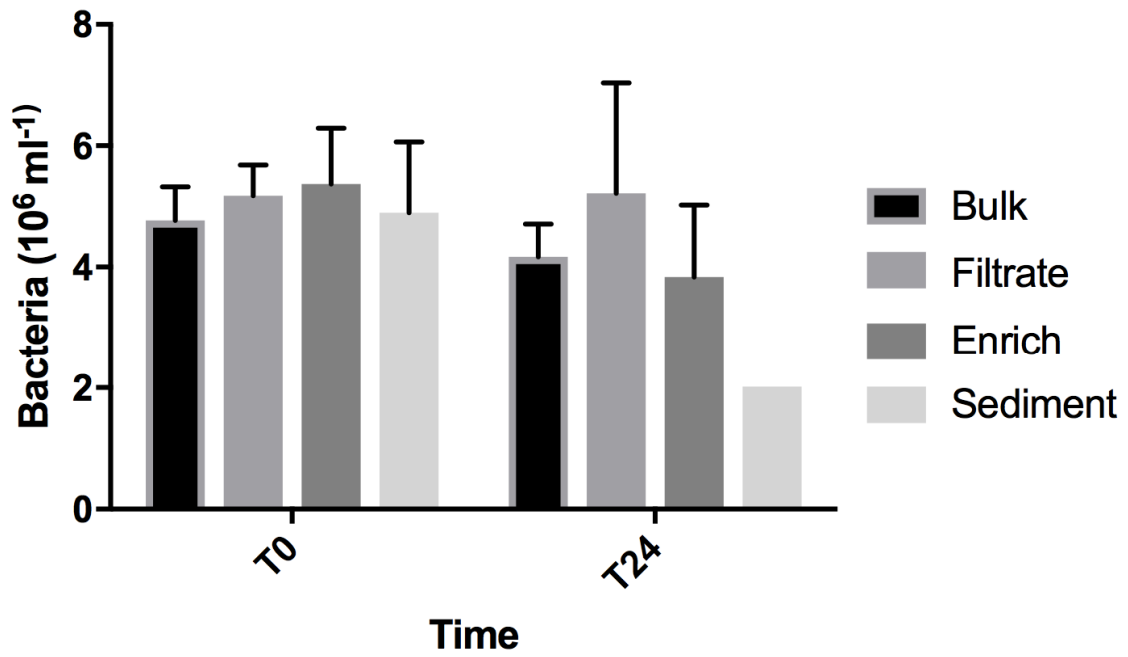

Fig. S2: Bacterial abundance over time in the particle enrichment experiment.  $n = 3$  and  $n = 4$  for T0 and T24, respectively, except for the sediment sample (T24) where only one replicate was available.

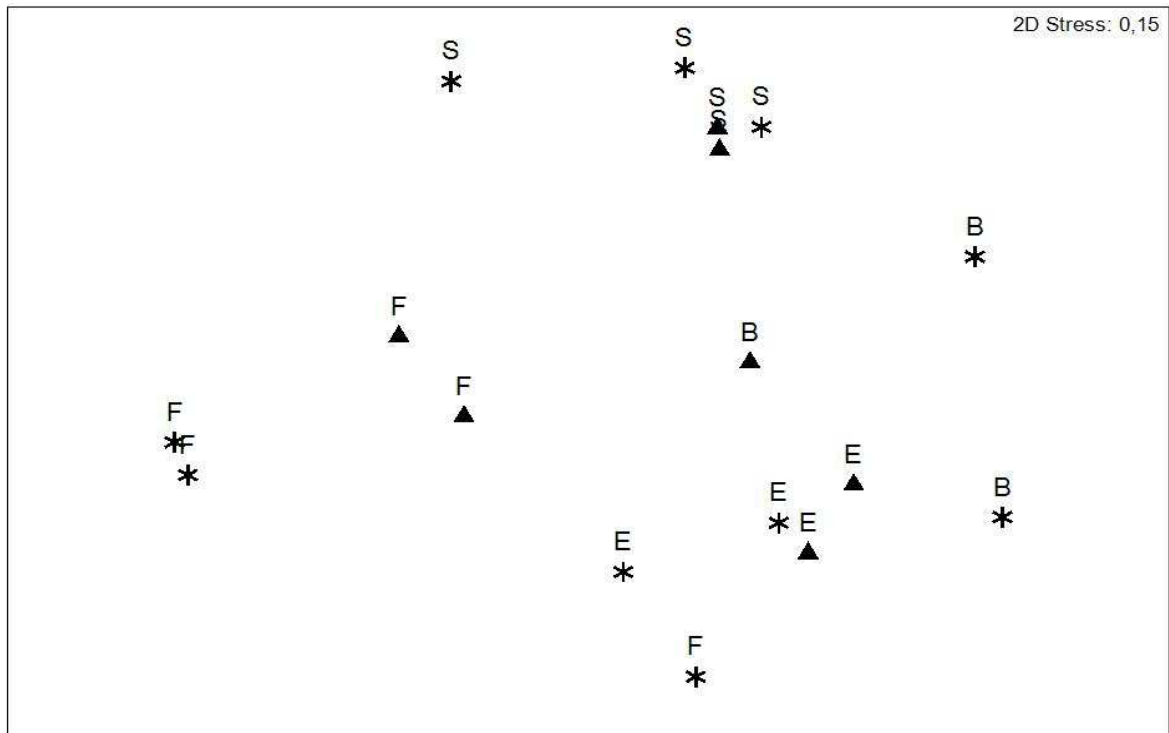

Fig. S3: Non-metric multidimensional scaling plot of Bray Curtis similarity between treatments based on rarefied ( $n = 5,125$ ) *nifH* gene composition in the particle enrichment experiment. Triangles and stars indicate T0 and T24, respectively, and letters indicate treatment (B = bulk, F = filtrate, E = enriched, S = sediment). Stress 0.15. In some cases, less than the maximum number of replicates per sample is shown since amplification was unsuccessful for single replicates.

**Supplementary Tables**

Table S1: Nutrient concentrations in the agar used to cover filters in the colonization experiment. Carbon, nitrogen, and phosphorus were added approximately in Redfield ratio (106:16:1, Redfield, 1934). The carbon concentration in the agar is ca. 10 fold higher than average Roskilde Fjord water at the time of sampling (unpublished data, Institute for Bioscience, Aarhus University). The different nutrients were combined so that equimolar concentrations of C, N, and P were added with each source molecule.

| <b>Nutrient (Redfield)</b> | <b>Nutrient source</b>     | <b>Formula</b> | <b>μM in Agar</b> |
|----------------------------|----------------------------|----------------|-------------------|
| Carbon<br>2.5 mM           | Glucose                    | $C_6H_{12}O_6$ | 83.3              |
|                            | Galactose                  | $C_6H_{12}O_6$ | 83.3              |
|                            | Mannitol                   | $C_6H_{14}O_6$ | 83.3              |
|                            | Sodium acetate             | $CH_3COONa$    | 250.0             |
|                            | Sodium pyruvate            | $C_3H_3NaO_3$  | 166.7             |
| Nitrogen<br>0.37 mM        | Potassium nitrate          | $KNO_3$        | 188.7             |
|                            | Ammonium chloride          | $NH_4Cl$       | 188.7             |
| Phosphorus<br>0.02 mM      | Sodium phosphate monobasic | $NaH_2PO_4$    | 23.6              |

Table S2: *nifH* (top) and 16S rRNA (bottom) gene primers and sample-specific indexes used for Illumina sequencing in this study.

| Name     | Gene | Sequence (5' to 3')           | Index    | Index names | Reference                |
|----------|------|-------------------------------|----------|-------------|--------------------------|
| nifH1-1  | nifH | NNNNTAGATCGCTGYGAYCCNAARGCNGA | TAGATCGC | S501        | Zehr and McReynolds 1989 |
| nifH1-2  | nifH | NNNNTATCCTCTTGYGAYCCNAARGCNGA | TATCCTCT | S503        | Zehr and McReynolds 1989 |
| nifH1-3  | nifH | NNNNAGAGTAGATGYGAYCCNAARGCNGA | AGAGTAGA | S504        | Zehr and McReynolds 1989 |
| nifH1-4  | nifH | NNNNGTAAGGAGTGYGAYCCNAARGCNGA | GTAAGGAG | S505        | Zehr and McReynolds 1989 |
| nifH1-5  | nifH | NNNNACTGCATATGYGAYCCNAARGCNGA | ACTGCATA | S506        | Zehr and McReynolds 1989 |
| nifH1-6  | nifH | NNNNAAGGAGTATGYGAYCCNAARGCNGA | AAGGAGTA | S507        | Zehr and McReynolds 1989 |
| nifH1-7  | nifH | NNNNCTAAGCCTTGYGAYCCNAARGCNGA | CTAAGCCT | S508        | Zehr and McReynolds 1989 |
| nifH1-8  | nifH | NNNNTATAGCCTTGYGAYCCNAARGCNGA | TATAGCCT | S510        | Zehr and McReynolds 1989 |
| nifH1-9  | nifH | NNNNCCTATCCTTGYGAYCCNAARGCNGA | CCTATCCT | S513        | Zehr and McReynolds 1989 |
| nifH1-10 | nifH | NNNNGGCTCTGATGYGAYCCNAARGCNGA | GGCTCTGA | S514        | Zehr and McReynolds 1989 |
| nifH1-11 | nifH | NNNNAGGCGAAGTGYGAYCCNAARGCNGA | AGGCGAAG | S515        | Zehr and McReynolds 1989 |
| nifH1-12 | nifH | NNNNTAATCTTATGYGAYCCNAARGCNGA | TAATCTTA | S516        | Zehr and McReynolds 1989 |
| nifH2-1  | nifH | NNNNTCGCCTTAADNGCCATCATYTCNCC | TAAGGCGA | N701        | Zehr and McReynolds 1989 |
| nifH2-2  | nifH | NNNNCTAGTACGADNGCCATCATYTCNCC | CGTACTAG | N702        | Zehr and McReynolds 1989 |
| nifH2-3  | nifH | NNNNTTCTGCCTADNGCCATCATYTCNCC | AGGCAGAA | N703        | Zehr and McReynolds 1989 |
| nifH2-4  | nifH | NNNNGCTCAGGAADNGCCATCATYTCNCC | TCCTGAGC | N704        | Zehr and McReynolds 1989 |
| nifH2-5  | nifH | NNNNAGGAGTCCADNGCCATCATYTCNCC | GGACTCCT | N705        | Zehr and McReynolds 1989 |
| nifH2-6  | nifH | NNNNCATGCCTAADNGCCATCATYTCNCC | TAGGCATG | N706        | Zehr and McReynolds 1989 |
| nifH2-7  | nifH | NNNNCCTCTCTGADNGCCATCATYTCNCC | CAGAGAGG | N708        | Zehr and McReynolds 1989 |
| nifH2-8  | nifH | NNNNAGCGTAGCADNGCCATCATYTCNCC | GCTACGCT | N709        | Zehr and McReynolds 1990 |
| nifH2-9  | nifH | NNNNCAGCCTCGADNGCCATCATYTCNCC | CGAGGCTG | N710        | Zehr and McReynolds 1991 |
| nifH2-10 | nifH | NNNNCGAGTAATADNGCCATCATYTCNCC | ATTACTCG | N721        | Zehr and McReynolds 1989 |
| nifH2-11 | nifH | NNNNTCTCCGGAADNGCCATCATYTCNCC | TCCGGAGA | N722        | Zehr and McReynolds 1989 |
| nifH2-12 | nifH | NNNNAATGAGCGADNGCCATCATYTCNCC | CGCTCATT | N723        | Zehr and McReynolds 1989 |
| nifH3    | nifH | ATRTTRTTNGCNGCRTA             |          |             | Zani et al. 2000         |
| nifH4    | nifH | TTYTAYGGNAARGGNGG             |          |             | Zani et al. 2000         |

| Name    | Gene        | Sequence (5' to 3')              | Index    | Index | Reference                                   |
|---------|-------------|----------------------------------|----------|-------|---------------------------------------------|
| 515f-1  | prokaryotes | NNNNTAGATCGCGTGCCAGCMGCCGCGGTAA  | TAGATCGC | S501  | Earth Microbiome Project, Bates et al. 2010 |
| 515f-2  | prokaryotes | NNNNTATCCTCTGTGCCAGCMGCCGCGGTAA  | TATCCTCT | S503  | Earth Microbiome Project, Bates et al. 2010 |
| 515f-3  | prokaryotes | NNNNAGAGTAGAGTGCCAGCMGCCGCGGTAA  | AGAGTAGA | S504  | Earth Microbiome Project, Bates et al. 2010 |
| 515f-4  | prokaryotes | NNNNGTAAGGAGGTGCCAGCMGCCGCGGTAA  | GTAAGGAG | S505  | Earth Microbiome Project, Bates et al. 2010 |
| 515f-5  | prokaryotes | NNNNACTGCATAGTGCCAGCMGCCGCGGTAA  | ACTGCATA | S506  | Earth Microbiome Project, Bates et al. 2010 |
| 515f-6  | prokaryotes | NNNNAAGGAGTAGTGCCAGCMGCCGCGGTAA  | AAGGAGTA | S507  | Earth Microbiome Project, Bates et al. 2010 |
| 515f-7  | prokaryotes | NNNNCTAAGCCTGTGCCAGCMGCCGCGGTAA  | CTAAGCCT | S508  | Earth Microbiome Project, Bates et al. 2010 |
| 515f-8  | prokaryotes | NNNNTATAGCCTGTGCCAGCMGCCGCGGTAA  | TATAGCCT | S510  | Earth Microbiome Project, Bates et al. 2010 |
| 515f-9  | prokaryotes | NNNNCCTATCCTGTGCCAGCMGCCGCGGTAA  | CCTATCCT | S513  | Earth Microbiome Project, Bates et al. 2010 |
| 515f-10 | prokaryotes | NNNNGGCTCTGAGTGCCAGCMGCCGCGGTAA  | GGCTCTGA | S514  | Earth Microbiome Project, Bates et al. 2010 |
| 515f-11 | prokaryotes | NNNNAGGCGAAGGTGCCAGCMGCCGCGGTAA  | AGGCGAAG | S515  | Earth Microbiome Project, Bates et al. 2010 |
| 515f-12 | prokaryotes | NNNNTAATCTTAGTGCCAGCMGCCGCGGTAA  | TAATCTTA | S516  | Earth Microbiome Project, Bates et al. 2010 |
| 806r-3  | prokaryotes | NNNNTTCTGCCTGGACTACHVGGGTWTCTAAT | AGGCAGAA | N703  | Earth Microbiome Project, Bates et al. 2010 |
| 806r-4  | prokaryotes | NNNNGCTCAGGAGGACTACHVGGGTWTCTAAT | TCCTGAGC | N704  | Earth Microbiome Project, Bates et al. 2010 |
| 806r-5  | prokaryotes | NNNNAGGAGTCCGGACTACHVGGGTWTCTAAT | GGACTCCT | N705  | Earth Microbiome Project, Bates et al. 2010 |

Table S3: Nearest relatives of predominant *nifH* OTUs from particle enrichment experiment (PE) and colonization (CT0) experiment. If OTUs from the different experiments were identical they are placed in the same box. Searches were conducted at the nucleotide level (BLAST) or the protein level (BLASTX; marked by \*). *nifH* gene subclusters were assigned according to Frank et al. (2016).

| OTU PE/CT0       | BLAST                                | Source                                | Description                                                                              | ID                 | Identity % | <i>nifH</i> Cluster | Taxonomy                |
|------------------|--------------------------------------|---------------------------------------|------------------------------------------------------------------------------------------|--------------------|------------|---------------------|-------------------------|
| OTU_1/<br>CT0_2  | BAL376                               | Baltic Sea,<br>surface_               | BAL376 clone 507_3b_B2                                                                   | KC140352           | 100        | 1G                  | Unassigned              |
| OTU_2 /<br>CT0_5 | Alcaligenaceae                       | Bottled<br>mineral water              | <i>Alcaligenaceae derxia</i><br>(França et al. 2016)                                     | KT964778           | 99.1       | 1K                  | Beta-<br>Proteobacteria |
| OTU_3            | uncultured                           | Cordgrass<br>rhizosphere              | Nitrogenase reductase                                                                    | AF216899           | 96         | 3H                  | Putative<br>anaerobe    |
| OTU_5            | uncultured                           | North Sea sediment                    |                                                                                          | KP959536           | 100        | 1A                  | Unassigned              |
| OTU_6            | uncultured                           | Marine<br>microbial mats              | Uncultured bacterium<br>clone 07-II.4 nitrogenase<br>( <i>nifH</i> ) gene, partial cds   | GU19353<br>1       | 99.7       | 3E                  | Putative<br>anaerobe    |
| OTU_7            | uncultured                           | Marine<br>microbial mats              | Uncultured bacterium<br>clone 08-III.17 nitrogenase<br>( <i>nifH</i> ) gene, partial cds | GU19389<br>9       | 99         | 3J                  | Putative<br>anaerobe    |
| OTU_13           | uncultured                           | Sediment                              | Uncultured bacterium<br>clone from oil<br>contamination                                  | DQ07803<br>3       | 96         | 1G                  | Unassigned              |
| OTU_24           | <i>Desulfosarcina<br/>cetonica</i> * | Flooded oil<br>stratum<br>Caspian Sea | <i>Desulfosarcina cetonica</i><br>Strain: JCM 12296                                      | WP_0546<br>97558.1 | 96         | 3H                  | Putative<br>anaerobe    |



|               |                                   |                                             |                                 |                |     |    |                     |
|---------------|-----------------------------------|---------------------------------------------|---------------------------------|----------------|-----|----|---------------------|
| OTU 51 /CT0_1 | Uncultured*                       | Seawater of Knorr Expedition                | Nitrogen-fixing bacterium clone | HM801708       | 99  | 1G | Unassigned          |
| CT0_3         | uncultured                        | Narragansett Bay                            | Marine sediment mesocosms       | JN645307       | 100 | 1G | Unassigned          |
| CT0_6         | <i>Amphritea atlantica</i> *      | Atlantic Ocean: Logatchev hydrothermal vent | Strain: DSM 18887               | SEQ47070.1     | 100 | 1G | Unassigned          |
| CT0_7         | <i>Paraburkholderia tuberum</i> * | Symbiont of <i>Mimosa pudica</i>            | Strain:STM 4252                 | CCJ09519.1     | 100 | 1K | Beta-Proteobacteria |
| CT0_12        | <i>Desulfopila aestuarii</i> *    | estuarine sediment                          | Strain: DSM 18488               | WP_073612834.1 | 99  | 3E | Putative anaerobe   |

Table S4: Bacterial colonization of filter surfaces over time.

| Time (h) | Abundance (Cells mm <sup>-1</sup> ) | Colonization rate (Cells mm <sup>-2</sup> h <sup>-1</sup> ) |
|----------|-------------------------------------|-------------------------------------------------------------|
| 0        | 52                                  |                                                             |
| 15       | 153                                 | 7                                                           |
| 40       | 4,613                               | 12                                                          |
| 80       | 8,038                               | 189                                                         |
| 140      | 41,424                              | 556                                                         |
| 210      | 87,545                              | 659                                                         |
| 305      | 125,257                             | 397                                                         |
| 400      | 136,686                             | 120                                                         |

Table S5: Morisita-Horn dissimilarity matrix based on 16S rRNA genes obtained from the colonization experiment. Index goes from 0 (identical) to 1 (completely different). Rep. is the difference between replicates (n = 3 for all).

| 16S rRNA | Rep.  | T40F  | T40W  | T80F  | T80W  | T140F | T140W | T300F | T300W | T400F |
|----------|-------|-------|-------|-------|-------|-------|-------|-------|-------|-------|
| T40F     | 0.028 |       |       |       |       |       |       |       |       |       |
| T40W     | 0.010 | 0.654 |       |       |       |       |       |       |       |       |
| T80F     | 0.032 | 0.113 | 0.791 |       |       |       |       |       |       |       |
| T80W     | 0.013 | 0.806 | 0.546 | 0.865 |       |       |       |       |       |       |
| T140F    | 0.016 | 0.304 | 0.755 | 0.291 | 0.828 |       |       |       |       |       |
| T140W    | 0.007 | 0.855 | 0.741 | 0.837 | 0.731 | 0.351 |       |       |       |       |
| T300F    | 0.021 | 0.460 | 0.806 | 0.471 | 0.870 | 0.096 | 0.360 |       |       |       |
| T300W    | 0.010 | 0.503 | 0.740 | 0.449 | 0.815 | 0.433 | 0.587 | 0.517 |       |       |
| T400F    | 0.015 | 0.483 | 0.816 | 0.492 | 0.886 | 0.121 | 0.377 | 0.020 | 0.511 |       |
| T400W    | 0.074 | 0.380 | 0.715 | 0.380 | 0.828 | 0.320 | 0.704 | 0.343 | 0.205 | 0.324 |

Table S6: Nearest relatives of the operational taxonomic units (OTUs), obtained from the colonization experiment, based on 16S rRNA gene sequencing. OTU`s shown here accounted for >80% of all reads in each sample. On the left side is the taxonomy assigned according to the SILVA database and on the right side is environment of origin (source), GenBank accession number (ID), and percent similarity to closest marine hit (Sim.). The far right column indicates whether the nearest relative was obtained from water (F = free-living) or from a surface (S).

| Assigned by SILVA database |                   |                    |                     | BLAST Hit           |          |          | Assigned          |
|----------------------------|-------------------|--------------------|---------------------|---------------------|----------|----------|-------------------|
| OTU                        | Family            | Genus              | Species             | Source              | ID       | Sim. (%) | Free-liv./Surface |
| OTU_4                      | Rhodobacterales   | Rhodobacteraceae   | Loktanelia          | Seawater            | KF911340 | 100      | F                 |
| OTU_9                      | Micrococcales     | Microbacteriaceae  | Candidatus Aquiluna | Seawater, 2 m depth | FR648224 | 100      | F                 |
| OTU_14                     | Burkholderiales   | Alcaligenaceae     | Achromobacter       | Chesapeake Bay      | EF471609 | 99       | F                 |
| OTU_8                      | Alteromonadales   | Alteromonadaceae   | Glaciecola          | Seawater            | KR077364 | 100      | F                 |
| OTU_22                     | Oceanospirillales | Oceanospirillaceae | Pseudospirillum     | Baltic Seawater     | KC899249 | 100      | F                 |
| OTU_20                     | Flavobacteriales  | Flavobacteriaceae  | NS3a marine group   | Surface seawaters   | KU173779 | 100      | F                 |
| OTU_19                     | SAR11 clade       | Pelagibacteriales  | Uncultured marine   | Surface mucus       | KU243169 | 100      | S                 |

|         |                   |                        |                             |                                               |          |     |   |
|---------|-------------------|------------------------|-----------------------------|-----------------------------------------------|----------|-----|---|
|         |                   |                        | bacterium                   |                                               |          |     |   |
| OTU_23  | SAR11 clade       | Pelagibacteriales      | Uncultured marine bacterium | Chesapeake-Delaware Bay water samples         | JX529400 | 100 | F |
| OTU_34  | Micrococcales     | Microbacteriaceae      | Candidatus Limnoluna        | Seawater, 2 m depth                           | FR648015 | 100 | F |
| OTU_33  | Oceanospirillales | Oceanospirillaceae     | Uncultured                  | Artificial surfaces submerged in marine water | EF215802 | 100 | S |
| OTU_15  | Oceanospirillales | Oceanospirillaceae     | Oleispira                   | Seawater                                      | KM277246 | 100 | F |
| OTU_695 | Unknown           |                        |                             | No close hit                                  |          |     |   |
| OTU_12  | Flavobacteriales  | Flavobacteriaceae      | Uncultured                  | Seawater;                                     | JQ198834 | 98  | F |
| OTU_6   | Oceanospirillales | Oceanospirillaceae     | Marinomonas                 | Ciliate cell                                  | KU524802 | 100 | S |
| OTU_3   | Rhodobacterales   | Rhodobacteraceae       |                             | Intertidal beach                              | GU061240 | 100 | S |
| OTU_10  | Alteromonadales   | Pseudoalteromonadaceae | Pseudoalteromonas           | OMZ water                                     | KY604938 | 100 | F |

|         |                    |                    |                | column                     |          |     |   |
|---------|--------------------|--------------------|----------------|----------------------------|----------|-----|---|
| OTU_18  | Sphingobacteriales | Saprospiraceae     | Aureispira     | Shell surface              | JN987168 | 100 | S |
| OTU_264 | Rhodobacterales    | Rhodobacteraceae   | uncultured     | Macroalgal surface         | GU451450 | 100 | S |
| OTU_11  | Oceanospirillales  | Oceanospirillaceae | Reinekea       | Oil-contaminated seawater, | KJ139653 | 100 | F |
| OTU_27  | Oceanospirillales  | Oceanospirillaceae | Oceanobacter   | Sediment                   | KC476293 | 100 | S |
| OTU_13  | Alteromonadales    | Colwelliaceae      | Colwellia      | Deep sediment              | LC138576 | 100 | S |
| OTU_17  | Alteromonadales    | Alteromonadaceae   | Glaciecola     | <i>Ascophyllum nodosum</i> | LN881333 | 100 | S |
| OTU_144 | Rhodobacterales    | Rhodobacteraceae   | Pacificibacter | Biofilm formation          | GQ274155 | 99  | S |
| OTU_7   | Oceanospirillales  | Oceanospirillaceae | Neptunomonas   | Seawater_Ireland           | JQ436093 | 100 | F |
| OTU_5   | Alteromonadales    | Colwelliaceae      | Colwellia      | Seawater_Ireland           | JQ436093 | 100 | F |
| OTU_16  | Flavobacteriales   | Flavobacteriaceae  | Maribacter     | Shallow-sea                | KX022625 | 100 | S |

|         |                  |                   |            |                      |          |     |   |
|---------|------------------|-------------------|------------|----------------------|----------|-----|---|
|         |                  |                   |            | hydrothermal         |          |     |   |
| OTU_712 | Rhodobacterales  | Rhodobacteraceae  | Uncultured | Tidal flat           | KC195795 | 98  | S |
| OTU_2   | Rhodobacterales  | Rhodobacteraceae  |            | Corrosion<br>biofilm | LT549343 | 100 | S |
| OTU_1   | Flavobacteriales | Flavobacteriaceae | Uncultured | Surface of algae     | HM437512 | 99  | S |

Table S7: Morisita-Horn dissimilarity matrix based on *nifH* genes from samples obtained over time in the colonization experiment; 0 – 400 h. The index goes from 0 (identical) to 1 (completely different). Rep. is the difference between replicates. F and W indicate filter and water, respectively. Numbers of replicates are given in parentheses.

| <i>NifH</i> | Rep.  | T0W<br>(1) | T80F  | T140W | T300F | T300W | T400F |
|-------------|-------|------------|-------|-------|-------|-------|-------|
| T80F (1)    |       | 1.000      |       |       |       |       |       |
| T140W (2)   | 0.676 | 0.990      | 0.962 |       |       |       |       |
| T300F (2)   | 0.027 | 0.983      | 0.927 | 0.788 |       |       |       |
| T300W (3)   | 0.002 | 0.992      | 0.979 | 0.803 | 0.016 |       |       |
| T400F (3)   | 0.000 | 0.993      | 0.978 | 0.813 | 0.021 | 0.002 |       |
| T400W (3)   | 0.000 | 0.993      | 0.979 | 0.816 | 0.023 | 0.003 | 0.001 |



## Reference List

Bates S. T., Berg-Lyons D., Caporaso J. G., Walters W. A., Knight R., Fierer N. (2010) Examining the global distribution of dominant archaeal populations in soil. *ISME J* 5:908-917

Frank I. E., Turk-Kubo K. A., Zehr J. P. (2016) Rapid annotation of *nifH* gene sequences using classification and regression trees facilitates environmental functional gene analysis. *Environ. Microbiol. Rep.* 8:905-916

Redfield, A. C. (1934) *On the proportions of organic derivatives in sea water and their relation to the composition of plankton*. University press of Liverpool.

Zani, S., Mellon, M. T., Collier, J. L., and Zehr, J. P. (2000). Expression of *nifH* genes in natural microbial assemblages in Lake George, New York, detected by reverse transcriptase PCR. *Appl. Environ. Microbiol.* 66:3119-3124.

Zehr JP, McReynolds LA (1989) Use of degenerate oligonucleotides for amplification of the *nifH* gene from the marine cyanobacterium *Trichodesmium thiebautii*. *Appl. Environ. Microbiol.* 55:2522-2526
